# Supplementary material
Source: PubMed Central journal article supplement (PMC6446199)

## **Appendix Figures**

**Appendix Figure S1:** Pharmacological inhibition of SPHK2 alleviates DHS-induced genomic and epigenomic instability in human cardiomyocytes. **5**

**Appendix Figure S2:** Increase in sphinganine level causes DNA damage in vivo. **6**

**Appendix Figure S1: Pharmacological inhibition of SPHK2 alleviates DHS-induced genomic and epigenomic instability in human cardiomyocytes.**

**(A)** Micrographs depicting the rescue of DHS-induced genomic instability by 10 $\mu$ M ABC294640, a SPHK2 inhibitor, along with the cardiac marker ACTN2 (in red).

**(B)** Assessment of H3K27ac levels in hCMs by immunostaining, along with the cardiac marker ACTN2 (in red).

**(C)** Representative micrographs depicting the levels of H3K56ac in hCMs by immunostaining, along with the cardiac marker ACTN2 (in red).

**(D)** Micrographs depicting the rescue of DHS-induced genomic instability by indicated concentrations of ABC294640, a SPHK2 inhibitor, along with the cardiac marker ACTN2 (in red).

**(E)** Micrographs depicting the nuclear expression of SPHK2 in hCMs and adult human heart sections, along with the cardiac marker ACTN2 (in red).

**(F)** Curcumin could not rescue the etoposide-induced DNA damage in the human cardiomyocytes, as shown here by staining with anti- $\gamma$ H2A.X antibody (green). Cardiac marker ACTN2 is red.

**(G)** Bar graph depicting the percentage of  $\gamma$ H2A.X positive cardiomyocytes nuclei in the indicated conditions. Error bars represent standard error of mean (n=3 biological replicates per condition).

**(H)** Bar graph depicting the numbers of differentially expressed genes (both up and down-regulated) upon DHS exposure of hCMs.

**(I)** Bar graph depicting the prominent Gene Ontologies inferred from the significantly upregulated genes upon DHS exposure of hCMs. Hypergeometric test was used for determining the p-value.

**(J)** Bar graph depicting the prominent Gene Ontologies inferred from the significantly down-regulated genes upon DHS exposure of hCMs. Hypergeometric test was used for determining the p-value.

**(K)** DHS exposure of hCMs do not activate ER and oxidative stress markers, depicted as heatmap.

Data information: ACTN2 is used to specifically label human cardiomyocytes. When not specified, the experiments were conducted in at least 3 biological replicates. Scale bar=10 $\mu$ m.

**Appendix Figure S2: Increase in sphinganine level causes DNA damage in vivo.**

**(A)** Representative micrographs depicting phospho-ATM staining on the ventricle sections for the indicated cohorts. ACTN2 is used to label mouse cardiomyocytes.

**(B)** Quantification of phospho-ATM positive CMs nuclei represented as percentage bar graph. Error bars represent standard error of mean (n=6 animals per condition).

**(C)** Representative micrographs depicting  $\gamma$ H2A.X and active-caspase 3 staining on the kidney and liver sections of the indicated cohorts.

**(D)** Quantification of  $\gamma$ H2A.X and active-caspase 3 positive cells in kidney and liver samples of the indicated conditions, depicted here as bar graphs. Error bars represent standard error of mean (n=6 animals per condition).

**(E)** Targeted lipidomics approach revealed an increase in DHS levels in heart and serum upon FB1 administration in mice. Lower panel micrographs represents the ventricle view from echocardiography. Error bars represent standard error of mean.

**(F)** Exposure of young adult zebrafish to elevated DHS levels leads to significant increase in DNA damage in cardiomyocytes, visualized here by  $\gamma$ H2A.X + nuclei. Curcumin prevents the DHS-induced DNA damage in vivo. MF-20 is used to label zebrafish cardiomyocytes. White arrowheads indicate representative positive signals whereas yellow arrowhead represents nuclei used for line-scan analysis.

**(G)** Florescence intensity line scan of the indicated cardiomyocyte nuclei (marked in yellow) below each micrograph.

**(H)** Bar graph depicting the percentage of  $\gamma$ H2A.X positive cardiomyocytes nuclei in the indicated conditions. Error bars represent standard error of mean.

Data information: When not specified, the experiments were conducted in at least 3 biological replicates. For pairwise comparisons Student T-test was performed for the estimation of the statistical significance. Scale bar = 10  $\mu\text{m}$  and for inlets 2 $\mu\text{m}$ .

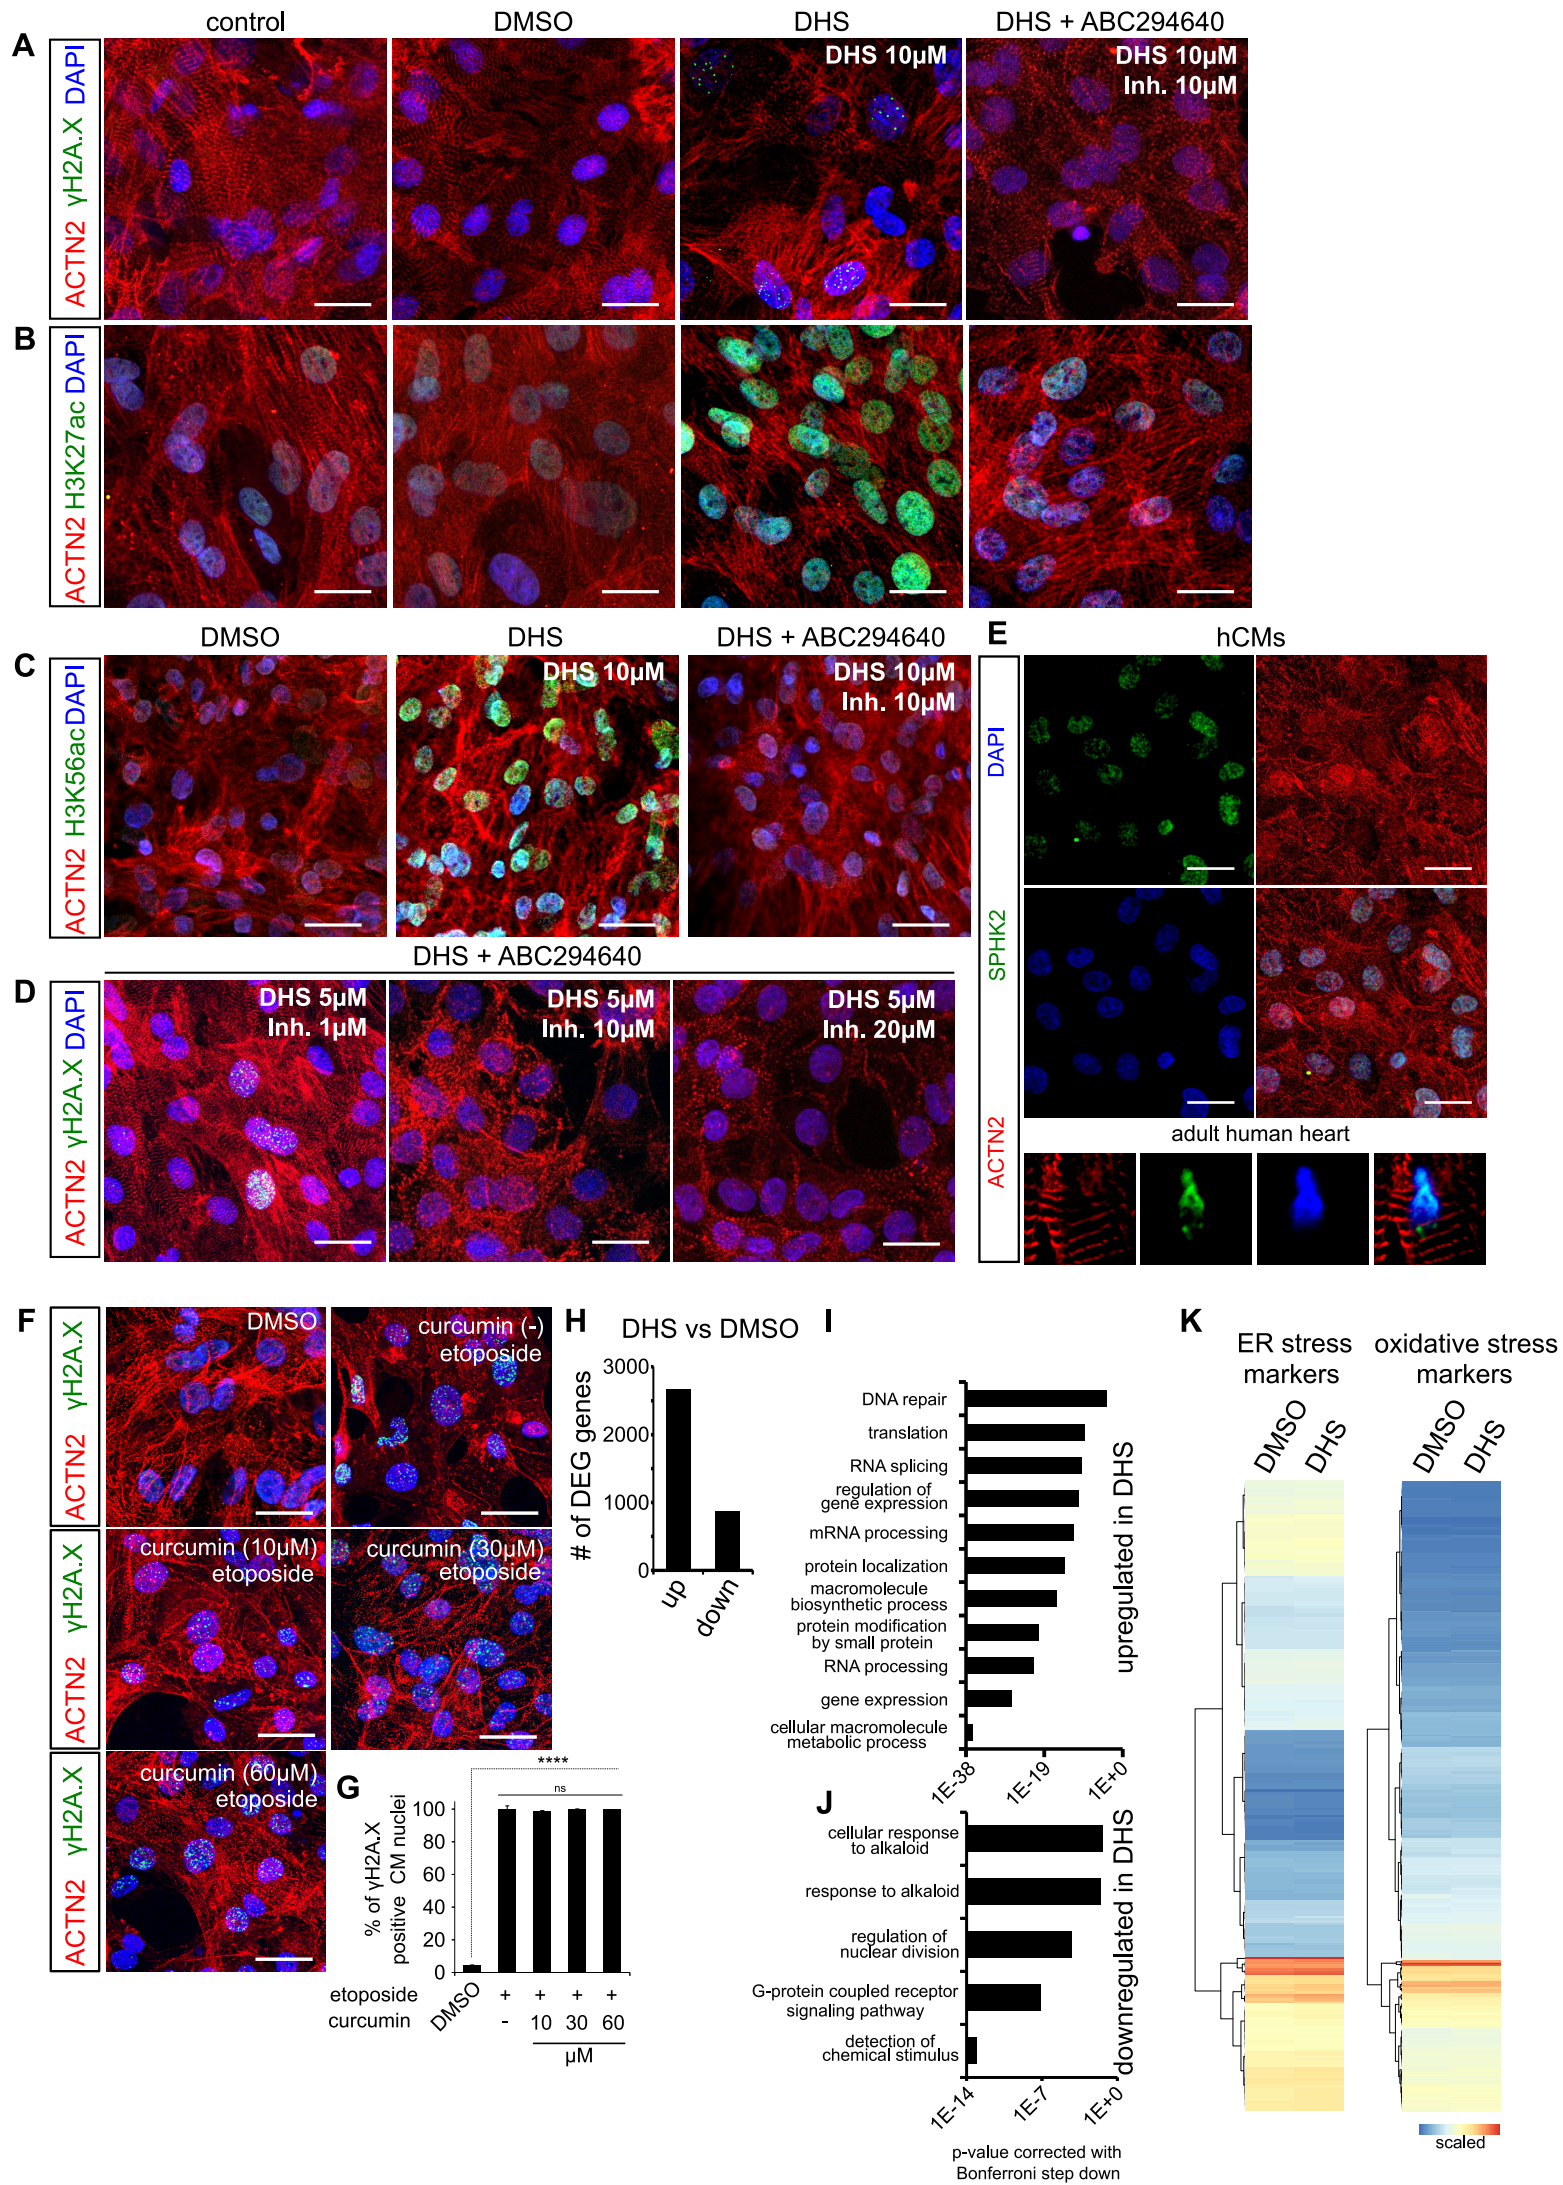

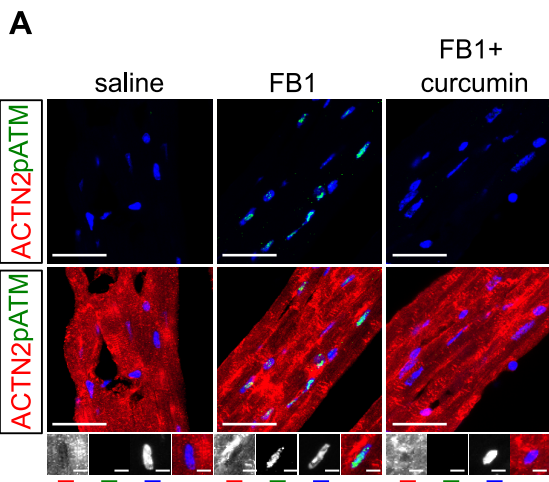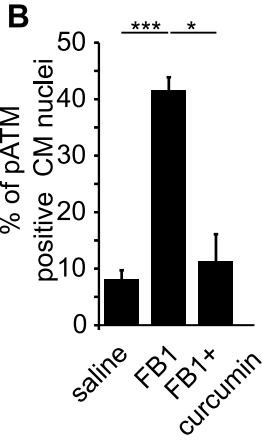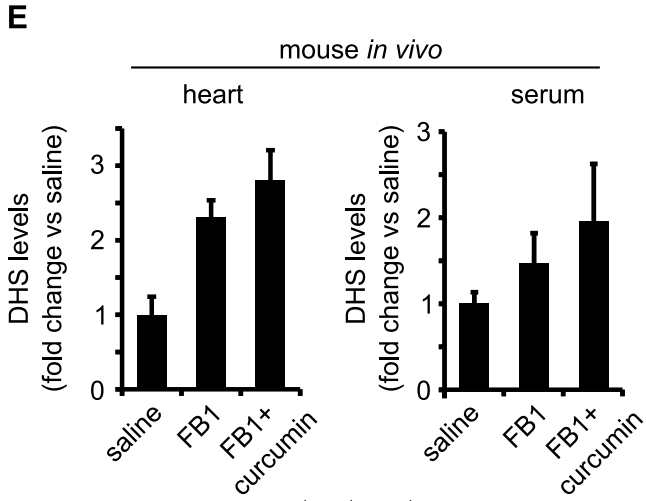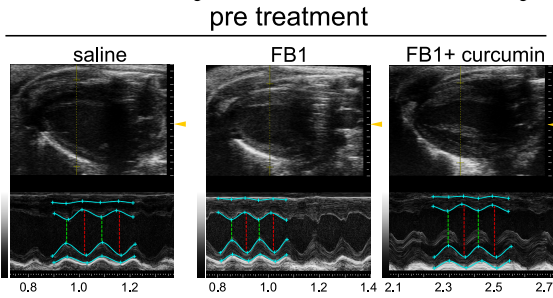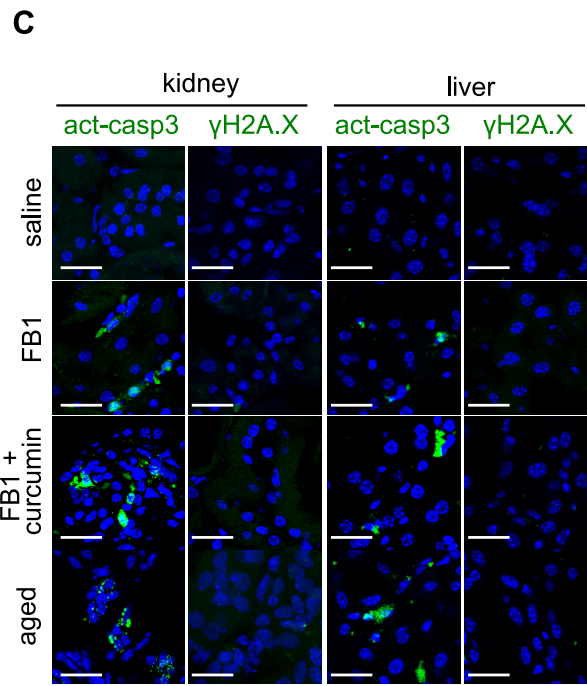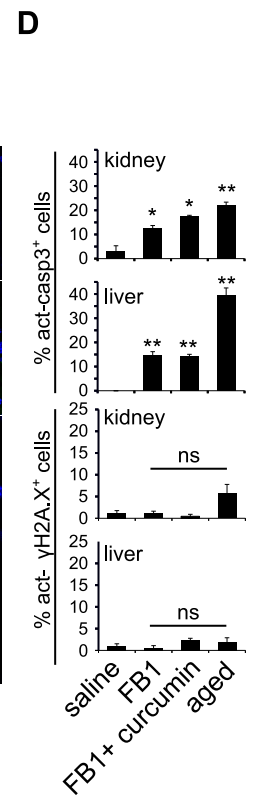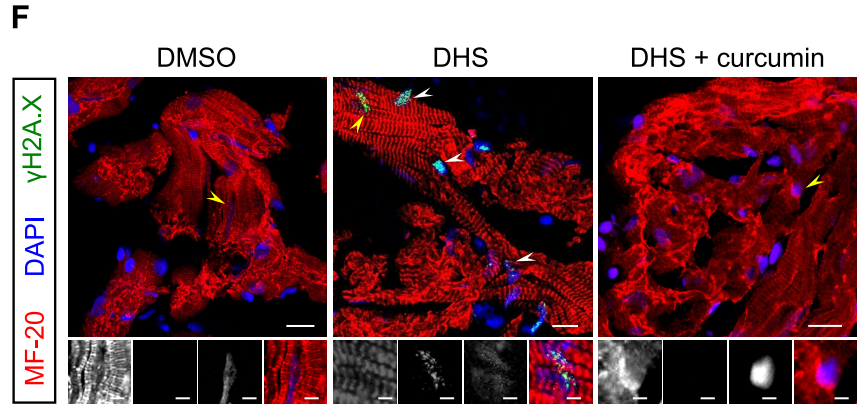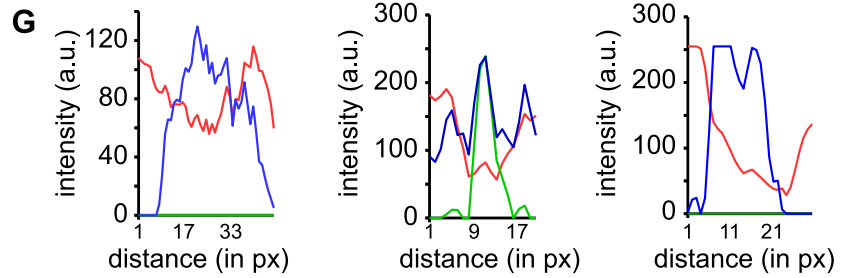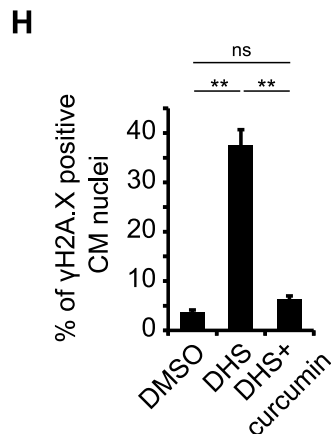

Supplement: EMBR-20-e47407-s001.pdf [file EMBR-20-e47407-s001.pdf]
